# Supplementary material for: Curcumin and Solid Lipid Curcumin Particles Induce Autophagy, but Inhibit Mitophagy and the PI3K-Akt/mTOR Pathway in Cultured Glioblastoma Cells
Source: PubMed Central journal article supplement (PMC6359162; doi:10.3390/ijms20020399), 2019-01-18
Supplement: ijms-20-00399-s001.pdf [file ijms-20-00399-s001.pdf]

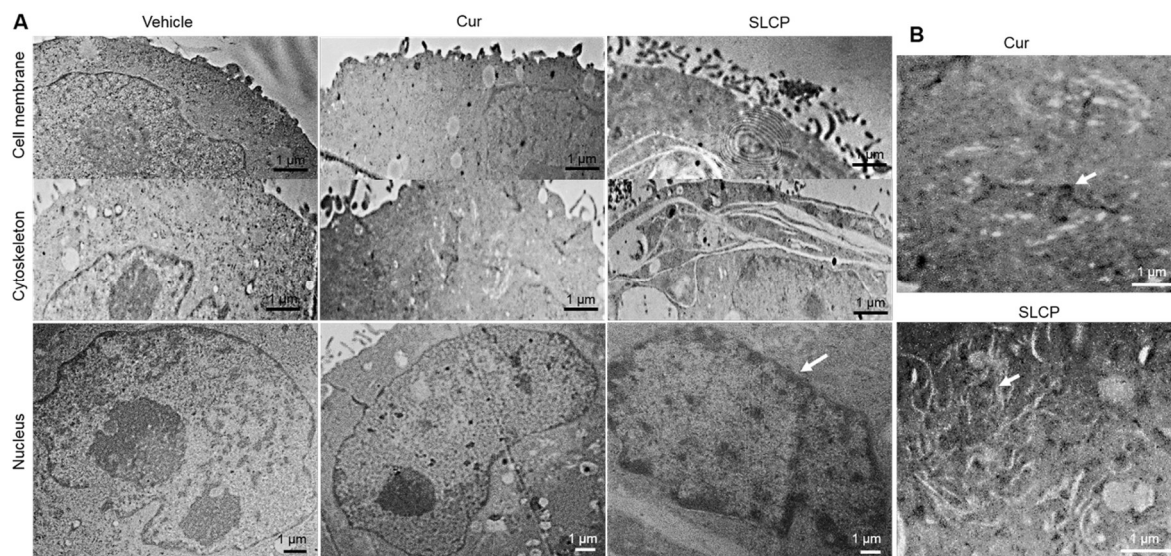

**Figure S1.** SLCP induced greater changes of membrane, cytoskeleton, and nuclear morphology than Cur in U-87MG cells. U-87MG cells were grown in EMEM, along with 100 IU/mL penicillin and 100 μg streptomycin/ml for 24 h and then treated with either Cur or SLCP (25 μM) for 24-h. Cells were processed for TEM and images were taken with JEOL-TEM. **A:** Representative TEM images showing that there was an increased membrane blebbing, cytoskeletal disorientation, and chromosomal condensation in the case of SLCP-treated cells in comparison to Cur or vehicle-treated cells. **B:** Actin filaments were degenerated by SLCP more than Cur-treated cells.
